# Supplementary material
Source: bioRxiv or medRxiv preprint supplement (https://medrxiv.org/content/medrxiv/early/2023/09/14/2023.09.07.23295190/DC5/embed/media-5.pdf)

**A**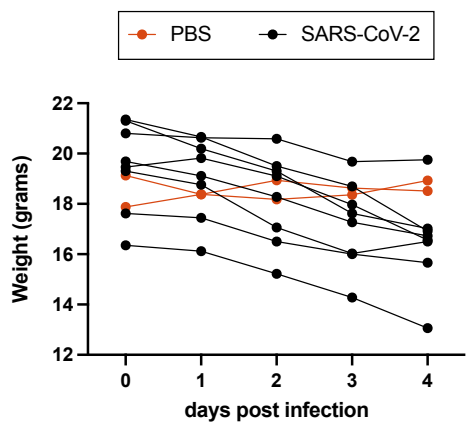**B**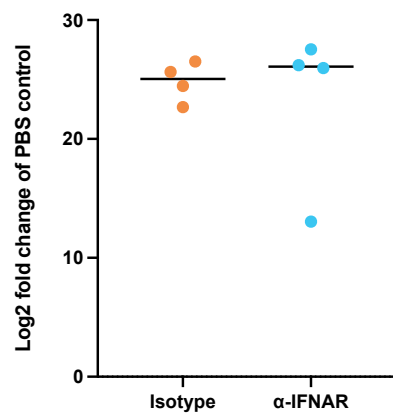**D**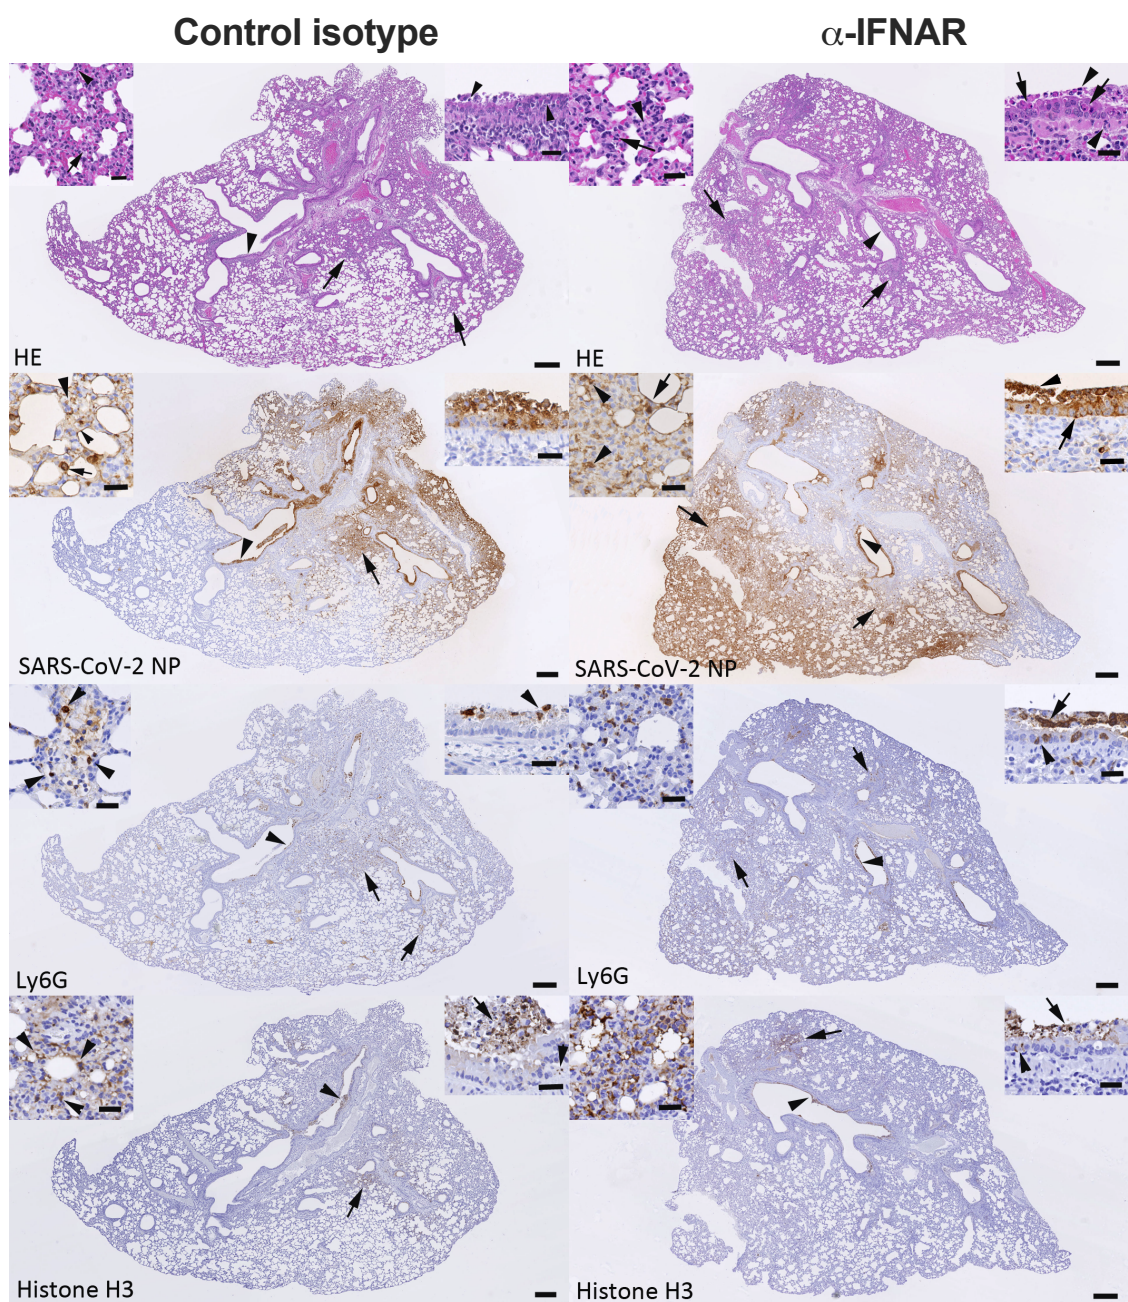

Supplement: Supplementary file [file media-5.pdf]
